# Supplementary material for: Genome-wide Association Study (GWAS) of Germline Copy Number Variations (CNVs) Reveal Genetic Risks of Prostate Cancer in Chinese population
Source: PubMed Central journal article supplement — J Cancer. 2018 Feb 27;9(5):923–8. doi: 10.7150/jca.22802 (PMC5868157; doi:10.7150/jca.22802), 2018-02-27

Supplementary Figure 1. Network analyses of genes (thick border) located in CNV regions by cBioportal based on 491 TCGA prostate cancer data. Medications target to actionable genes are showed.

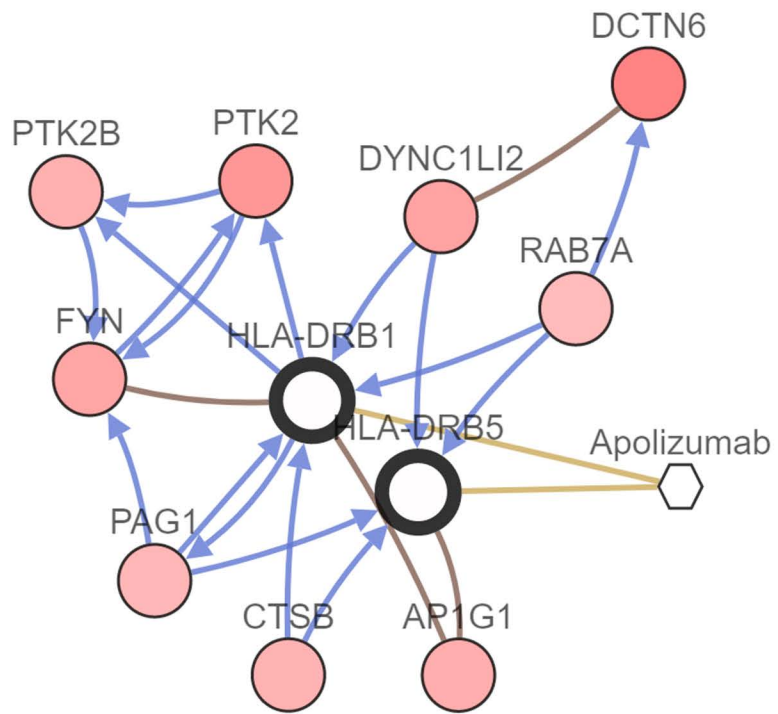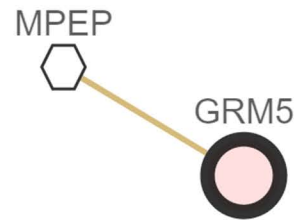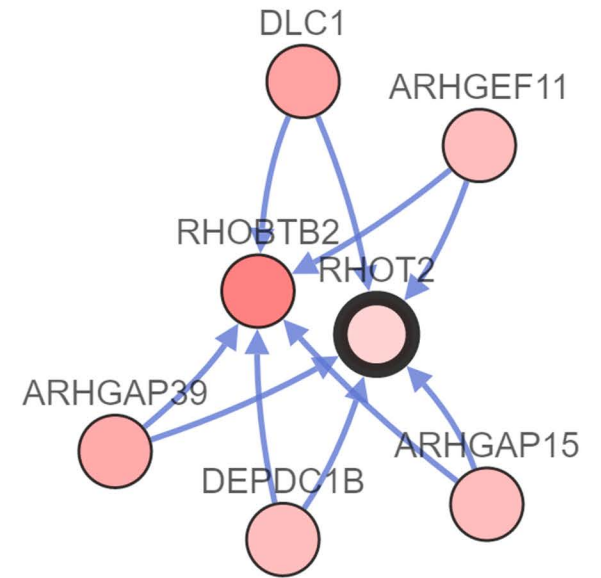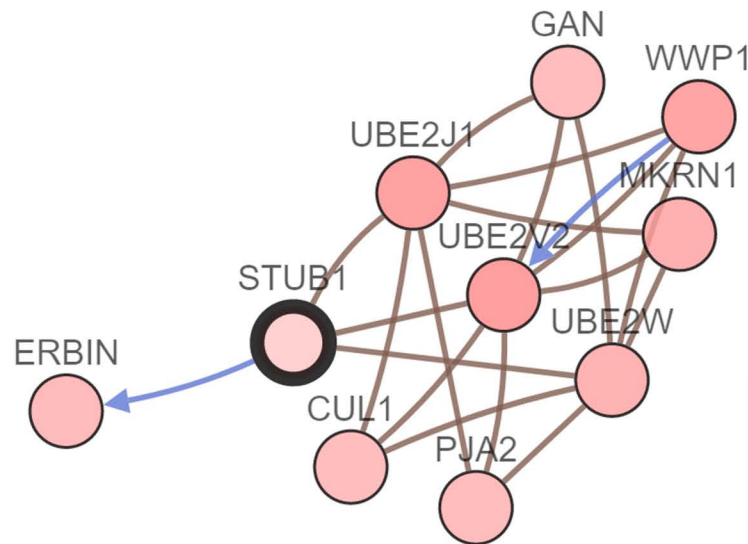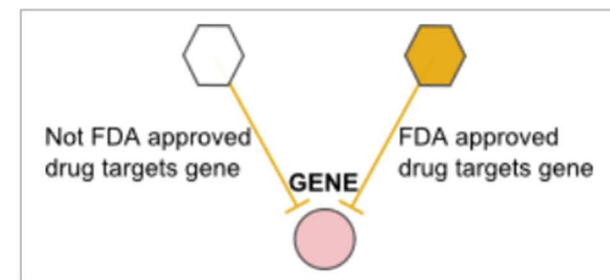

Supplement: jcav09p0923s1.pdf [file jcav09p0923s1.pdf]
